# Supplementary material
Source: publisher site journal article supplement (https://www.dovepress.com/article/209318)
Supplement: Supplementary file 1 [file get_supplementary_file.php]

***Appendix***

**-Interview questions/prompts**

| **1-Questions related to the content of the pharmaceutical policies**  -What has been the content of the pharmaceutical sector supportive policies and regulations in Iran? What were their goals and intentions? What are the shortcomings? What should be included?  -What do you think has changed the approaches to pharmaceutical policies in the country since the beginning? Why?  **2-Questions related to the context of the pharmaceutical policies**  How do you think the impact of the contextual factors (economic, political, social and cultural) at both national and international levels has been on the policy making process (development, implementation and evaluation of pharmaceutical policies), and the content of pharmaceutical policies in the country? Please explain.  **3-Questions related to the process of the pharmaceutical policies**  Please explain about the pharmaceutical policy making process in Iran. How a pharmaceutical policy is shaped and developed?  **4-Questions related to the process of the pharmaceutical policies**  How are pharmaceutical control policies and regulations in Iran implemented?  -What people and organizations have been involved in the implementation? Do you think there are organizations or people who should be involved but are not involved? Do you think they should be involved? Why did not they get involved? How can they be involved? What challenges have been there in the process implementation? How do you think should these challenges be overcome? What have been the achievements?  -Have you ever participated in the development of a specific pharmaceutical policy? Please explain.  -How important is the government's role in pharmaceutical policy-making decisions?  **5**-Are there specific supportive policies to support the field of research and development in the pharmaceutical sector in Iran? Please explain.  **6**- Are there specific supportive policies to support the supply and procurement of medicines in Iran? Please explain  **7**- Are there specific supportive policies to support the distribution of medicine in Iran? Please explain  **8**- Are there specific supportive policies to support drug supply in Iran? Please explain  **9**- Are there specific supportive policies for import and export of medicine in Iran? Please explain  **10**- Are there specific supportive policies to support the pharmaceutical industry (public and private) in Iran? Please explain  **11**-In your opinion, what should be the future pharmaceutical sector supportive policies in Iran and what should they focus on?  **12**-What do you think is the most appropriate policy for the pharmaceutical sector in Iran? |
| --- |
